1 Herpetologists' Conservation Research Focus Drives Their Intentions to Participate in  
2 Future Public Engagement

3  
4 Kirsten A Hecht<sup>1</sup>, Kathryn A. Stofer<sup>2</sup>, Martha Monroe<sup>3</sup>, Geraldine Klarenberg<sup>3</sup>, and Max  
5 A. Nickerson<sup>4</sup>

6  
7  
8 <sup>1</sup>School of Natural Resources and Environment, University of Florida, Gainesville, FL 32611

9 <sup>2</sup>Department of Agricultural Education and Communication, University of Florida, Gainesville, FL  
10 32611

11 <sup>3</sup>School of Forest, Fisheries, and Geomatics Sciences, University of Florida, Gainesville, FL  
12 32611

13 <sup>4</sup>Florida Museum of Natural History, University of Florida, Gainesville, FL 32611  
14

15 Abstract:

16 Public Engagement with Science (PES) is a popular topic in the science community due to  
17 general concerns about public support for science, attitudes toward science, and changes in  
18 scientific funding requirements. PES may be especially relevant in conservation disciplines as  
19 the public plays an important role in conservation practice. Herpetofauna specifically stand to  
20 benefit, as PES activities can help improve attitudes and conservation behavior of participants  
21 toward uncharismatic species. We assessed the current scope of herpetologists' PES activities  
22 and investigated factors associated with their participation in PES. We used a closed-ended  
23 question survey distributed via the listservs of four American herpetological organizations.  
24 Herpetologists' intentions to engage at least 10 hours in the next 12 months significantly differed  
25 between herpetologists with high and low conservation research focuses, but hours of  
26 engagement in the past 12 months was not significantly different among these groups. Despite  
27 most responding herpetologists having limited formal training, time, resources, and institutional  
28 support, many participated in a variety of PES activities, often utilizing partnerships and their  
29 own resources. Sampled herpetologists rarely evaluated their PES activities or considered  
30 publishing about their engagement activities. Some respondents expressed unease with the  
31 idea of message framing. Respondents were interested in evaluation training and providing  
32 accessible opportunities, and grant funds were the most likely interventions to increase  
33 herpetologists' participation in PES. These results provide reference data and insight into the  
34 public engagement practices and needs of practicing herpetologists and conservation scientists.

35

36

37 Keywords: Public engagement, Science communication, Human Dimensions, Community  
38 Engagement

39

40 Author statement: We informed participants of their rights and protections as approved  
41 by University of Florida IRB201800258. None of the authors have conflicts of interest  
42 related to this research. Funding for the research was provided by a Roger Conant  
43 Grant from the Society for the Study of Amphibians and Reptiles (SSAR). SSAR had no  
44 role in interpretation of data, the writing of the report, or the decision to submit the article  
45 for publication.

46

## 47 **Introduction**

48 As a field, conservation biology is intimately tied with public interest. Wildlife  
49 conservation efforts based on biological scientific knowledge and solutions alone are  
50 often unsuccessful at meeting conservation goals (Agrawal and Gibson, 1999; Knight et  
51 al., 2006; Mascia et al., 2003; Meffe, 2002; Wilson et al., 2007) and there have been  
52 repeated recent calls to not only include, but to make social factors a key aspect of  
53 conservation (Ban et al., 2013; Bennett et al., 2017; O'Donnell & Durso, 2014; Saunders  
54 et al., 2006; Wake, 2008b). Mascia et al. (2003, p. 649) expressed the essence of this  
55 shift in the following passage, "Although it may seem counterintuitive that the foremost  
56 influences on the success of environmental policy could be social, conservation  
57 interventions are the product of human decision-making processes and require changes  
58 in human behavior to succeed." Public engagement with science (PES), which the  
59 American Association for the Advancement of Science (AAAS) describes as  
60 "intentional, meaningful interactions that provide opportunities for mutual learning  
61 between scientists and members of the public," (AAAS, 2021; para. 1) is one tool that  
62 could bridge between these ecological and socio-ecological factors, potentially serving  
63 to increase public support for policy and conservation activities.

64 A holistic approach to conservation may be particularly important to protecting  
65 less charismatic animal taxa that receive less support from both the public and from the

66 wildlife field. Reptiles and amphibians in particular face unique conservation challenges  
67 when compared to other organismal groups. Herpetofauna continue to decline in  
68 number with researchers now estimating that over 40% of the world's studied  
69 amphibians (IUCN, 2018) and ~20% of studied reptiles (Böhm et al., 2013) are  
70 threatened with extinction worldwide while also facing localized decreases in occupancy  
71 and metapopulations (Adams et al., 2013; Grant et al., 2016). Herpetofaunal  
72 conservation also faces challenges from deep social and cultural barriers including  
73 attitudes, social values, and norms (Alves et al., 2012; Ceríaco, 2012; Ceriaco et al.,  
74 2011; Perry-Hill et al., 2014; Tarrant et al., 2016), negative emotions such as disgust  
75 (de Pinho et al., 2014; Gunnthorsdottir, 2001; Knight, 2008), and even innate fear  
76 (Hoehl et al., 2017; LoBue and DeLoache, 2008), which ultimately lead to high rates of  
77 persecution, less public support for conservation, and less priority in regards to research  
78 and conservation attention and funding (Bonnet et al., 2002; Clucas et al., 2008;  
79 Gratwicke et al., 2012).

80       Public engagement activities provide an opportunity for herpetologists to increase  
81 conservation support for reptiles and amphibians among the public. Interventions  
82 focused on general knowledge (i.e., one-way communication) or simple exposure, such  
83 as watching snakes in a zoo, have not shown significant changes in attitudes towards  
84 herpetofauna (Prokop and Tunnicliffe, 2010; Tomažic, 2011), or changes in values or  
85 behavior (Morgan and Gramann, 1989). In contrast, positive interactive experiences with  
86 snakes, specifically direct contact (Prokop and Tunnicliffe, 2010) and modeling, where  
87 individuals can see others positively interacting with animals (Morgan and Gramann,  
88 1989), were most effective at eliciting changes in participants, particularly when

89 information was included as part of the experience. Even limited one-day exposures,  
90 such as field trips where students were able to handle and measure animals, altered  
91 likeability and individual support for conservation of snakes and salamanders (Morgan &  
92 Gramann, 1989; Reynolds et al., 2018). Programs utilizing a full treatment set  
93 (exposure, knowledge, modeling, and direct contact) may have the highest success. A  
94 citizen science program in India, for example, reduced human persecution of snakes in  
95 the area and improved attitudes of participants towards snakes (Balakrishnan, 2010).  
96 Ultimately these types of activities may help change attitudes about uncharismatic  
97 species because they foster familiarity with the groups or species and can even change  
98 aesthetic beliefs and attitudes which has been linked to increased positive attitudes  
99 towards species (Jimenez and Lindemann-Matthies, 2015; Reimer et al., 2014).

100         Research related to PES suggests that in some cases, a scientists' field or topic  
101 of study may be an important factor in determining whether they choose to engage with  
102 public. For example, a Pew Research Report found that scientists who felt the public  
103 had more interest in their research area were more likely to engage (Pew Research  
104 Center, 2015). In that same study, scientists who felt there was controversy in their  
105 fields were more likely to talk to reporters and citizens as well as use blogs and social  
106 media when compared to scientists who rarely or never saw debate about their field in  
107 the public eye (Pew Research Center, 2015). In another study of 1,254 biomedical  
108 scientists, Dudo (2012) found that respondents who believed that publicly  
109 communicating about their work was beneficial to society were more likely to engage in  
110 public activities. However, it is unclear whether conservation sub-fields follow this trend.  
111 Despite the potential value of public engagement as a conservation tool, there remains

112 limited study on the broader public engagement activities of conservation biologists  
113 focused on reptiles and amphibians. During a literature review, we found only limited  
114 examples of publications related to education and outreach in any U.S. based  
115 herpetological journal over the past 20 years (Clancy et al., 2021). These publications  
116 largely focused on herpetology courses in formal education settings or museums  
117 (Chiszar, 1998; Frost, 1998) and citizen science from a data collection perspective  
118 (O'Donnell and Durso, 2014; Weber et al., 2016). A handful described education and  
119 conservation outcomes for a variety of audiences including herpetological educators, K-  
120 12 teachers, and children (Ballouard et al., 2012; Gangloff, 2011; Rommel-Crump et al.,  
121 2016; Wojnowski, 2008). A non-peer reviewed report found surveyed individuals in all  
122 sectors of herpetology, including hobbyists, participating in public outreach activities,  
123 specifically helping run or organize public education programs alone or on behalf of  
124 herpetological societies (Southwestern Center for Herpetological Research, 2017).  
125 Many of the surveyed recreational and professional herp-enthusiasts have attended or  
126 facilitated some type of educational activity. There is no additional research to our  
127 knowledge specifically related to public engagement by herpetologists, including  
128 whether herpetologists whose research focuses primarily on conservation are more  
129 likely to engage with the public due to a higher public interest factor. Therefore, we  
130 surveyed herpetologists regarding their public engagement activities and experiences  
131 as a case study to help improve the effectiveness of public engagement as a tool for the  
132 conservation of uncharismatic animals. The objectives of this study were to determine:

- 133 1. The types of engagement activities in which herpetologists participate;
- 134 2. How prepared herpetologists are to engage with the public;
- 135 3. The barriers herpetologists face to engage with the public; and

136 4. Whether herpetologists' professional interest in conservation is a significant  
137 predictor of their public engagement participation.

## 138 **Methods**

### 139 **Population of Interest**

140 The population of interest for this study is herpetological researchers, ages 18  
141 and over, who reside in the United States. We defined herpetological researchers as  
142 individuals who conduct original scientific herpetological research and have published at  
143 least one related peer-reviewed paper in a scientific journal. The population  
144 encompassed herpetologists from all potential sectors, including, but not limited to,  
145 universities, zoos, government agencies, museums, non-governmental organizations,  
146 and private industry, and contained herpetologists with varied levels of herpetological  
147 related conservation research.

### 148 **Survey Instrument**

149 We developed a survey consisting of 37 closed-ended questions which was  
150 based on our research questions as well as results from fifteen semi-structured  
151 interviews (Hecht, 2021). Questions covered demographics; herpetology research  
152 interests; how often conservation was a focus of their work; study animals; and public  
153 engagement knowledge, training, and practices. The survey had four screening  
154 questions that asked if respondents fit the criteria of our population of interest (residing  
155 in United States, 18 or older, conducted original research on reptiles and/or amphibians,  
156 and have published at least one peer-reviewed paper on reptiles and amphibians) and a  
157 general question about what types of publicly oriented activities they had participated in  
158 within the last 12 months. Following these questions, we provided the AAAS definition  
159 of public engagement with science as "intentional, meaningful interactions that provide

160 opportunities for mutual learning between scientists and members of the public." (AAAS,  
161 2021; para. 1) We measured level of participation in public engagement by asking about  
162 the frequency of their participation in the last 12 months as well as their intention to  
163 participate in the next 12 months. To quantify past engagement, participants were  
164 asked to choose categories corresponding to how many hours of herpetology related  
165 public engagement they participated in as an expert within the last 12 months (I did not  
166 engage, <10, 10-49, 50-99, and >100). Future participation was measured from two 7-  
167 point bipolar adjective scale questions (Ajzen, 2006) which measured their intention to  
168 participate in at least 10 hours of public engagement over the next 12 months: 1) I  
169 intend to participate in public engagement as a herpetology expert for at least 10 hours  
170 in the next 12 months (highly likely to highly unlikely), and 2) I will try to participate in  
171 public engagement as a herpetology expert for at least 10 hours in the next 12 months  
172 (definitely will not to definitely will).

173         Eight graduate students and three faculty with expertise in questionnaire design,  
174 public engagement, and/or herpetology fields reviewed the survey in two rounds. We  
175 then pilot tested the survey with two students and four professionals affiliated with  
176 environmentally related fields that would be familiar with the terminology, but not within  
177 our specific population of interest, i.e., non-herpetologists, to maximize the number of  
178 people we sampled, as most herpetologists would receive the survey through their  
179 professional organizations. After each round, participants sent us either verbal or written  
180 feedback, and we incorporated their feedback into the survey. The survey was entered  
181 into Qualtrics prior to distribution.

## 182 **Recruitment**

183 We sent the final Qualtrics survey link to members of four North American  
184 herpetological societies and organizations to share via an anonymous link sent through  
185 their membership listservs and newsletters: Partners in Amphibian and Reptile  
186 Conservation (PARC) (membership unknown), the Society for the Study of Amphibians  
187 and Reptiles (SSAR) (1,613 members), Herpetologists' League (HL) (599 members in  
188 2015), and the American Society for Ichthyologists and Herpetologists (ASIH) (1,517  
189 members with approximately half identifying as herpetologists). The survey was open  
190 for one month between 1 September, 2019 and 1 October, 2019. Every 25th participant  
191 was eligible to receive a \$10 prepaid debit card by providing their email in a separate  
192 survey provided upon the completion of their survey.

## 193 **Analysis**

194 Prior to analysis, we converted the 7-point bipolar scales of the intention  
195 questions to integers ranging from -3 to 3 and added the two intention questions  
196 together to obtain a composite score for each participant. We checked all variables for  
197 normality and collinearity prior to analysis. A correlation of greater than 0.6 between  
198 predictor variables was used as the cut off value for determining multicollinearity  
199 (Dormann et al., 2013). We used basic descriptive statistics to analyze survey data for  
200 all objectives. To determine if herpetologists working in the conservation biology  
201 subfield were more likely to engage with the public, we analyzed subfield data and  
202 conservation focus of research data using ordinal regression analysis. We used a  
203 backward stepwise model building approach using Akaike Information Criterion (AIC)  
204 estimates to determine the best fit for each individual model (Akaike, 1998). We also  
205 examined whether the level of conservation focus of respondents impacted their



206 engagement activities. Due to the low response count in the never category (n=8),  
207 responses to the question regarding the amount of research related to herpetological  
208 conservation was transformed from 5 choices (Never (n=8), Less than half the time  
209 (n=47), About half the time (n=23), More than half the time (n=45), and Always (n=55) to  
210 3 categories (Low (n=55), Medium (n=23), and High (n=100)) prior to analysis. We  
211 hypothesized that individuals who had a high conservation focus in their research would  
212 a) have participated more hours in public engagement activities in past 12 months and  
213 b) would also exhibit a higher intention to participate in public engagement for at least  
214 10 hours in the next 12 months. Due to the lack of normality in the data, we conducted a  
215 non-parametric Kruskal-Wallis test to look for differences among the three conservation  
216 focus categories to test our hypotheses. We then conducted a post-hoc pairwise  
217 comparison using a Dunn test with a Bonferroni correction. All significance tests used  
218 an alpha value of 0.05.

219 We analyzed all data using R (R Core Team 2020). We conducted ordinal  
220 regression analysis using the polr and StepAIC functions in the MASS R package  
221 (Venables & Ripley, 2002); We used the FSA R package (Ogle et al., 2020) to conduct  
222 the Dunn test. All other stats were analyzed through the base stats program of R.

## 223 **Results**

224 A total of 355 unique individuals started the survey, of which 217 were eligible  
225 participants that passed the four screening questions. Of those respondents, 178  
226 completed the full survey. Due to disseminating the survey through professional  
227 associations and overlapping memberships, it was not possible to calculate a population  
228 size or response rate. Estimated survey time from Qualtrics was 17.4 minutes and pilot  
229 testers took between 14 and 43 minutes. Only 12 study participants took longer than 1.5

230 hours to complete the survey. The mean survey duration for the remaining 166  
231 participants was  $21.15 \pm 13.00$  minutes.

## 232 **Demographics**

233 Demographics matched findings of other demographic surveys of herpetology  
234 organizations (*2019 Diversity Survey Report, 2020; Demographic and Atmospheric*  
235 *Survey, 2020*). Participants included representatives from all adult age categories with  
236 57.9% coming from two age classes (25-34 and 35-44 years; Figure 1). Most survey  
237 takers self-identified as men (58.4%), with the remaining participants identifying as  
238 women (38.8%) and non-binary/third gender (1.1%). A small number (1.7%) preferred  
239 not to disclose their gender. Of the participants, 7.3% identified as Hispanic, Latino, or  
240 Spanish Origin. Most participants (89.9%) described their race as white, while 1.7% and  
241 0.5% identified as Asian and Black/African American, respectively. Three respondents  
242 described themselves as multi-racial.

243 Respondents ranged across experience levels, but 41.0% had been in the field  
244 for at least 20 years. Most participants had an advanced degree with 55.6% holding  
245 some type of doctoral degree, 34.3% holding a master's degree, 8.4% having a  
246 bachelor's degree, and 1.7% having a high school diploma as their highest education  
247 level. Participants had expertise in a variety of sub-fields, with many selecting multiple  
248 sub-fields to describe their research. The number of identified sub-fields per participant  
249 ranged from 1 to 8, with a mean  $3.32 \pm 1.41$  sub-fields. Ecology and Conservation were  
250 the most frequently selected categories with over 70% of participants identifying either  
251 of them as a sub-field of their research. Behavior (42%) and Evolution (40%) were the  
252 next most frequently reported sub-fields. Participants also represented a variety of  
253 sectors, with almost a third coming from public institutions. Individuals from

254 undergraduate- and graduate-serving institutions represented the highest percentage of  
255 individuals, over 30% of the sample participants, followed by agencies (22%), and  
256 museums (10%). One out of five respondents reported themselves as students. Survey  
257 takers represented all four of the organizations surveyed: ASIH (54.5%), HL (44.4%),  
258 SSAR (70.2%), and PARC (49.4%). Many individuals were members of multiple  
259 societies, with respondents belonging to a mean of  $2.19 \pm 1.10$  societies and 11.8% of  
260 respondents belonging to all four. In addition, 27.0% of responding herpetologists  
261 belonged to a regional herpetological society and 11.2% identified as members of a  
262 local herpetological organization.

### 263 **Objective 1: Types of Activities**

264 Almost all (98%) of those surveyed had participated in public engagement  
265 activities as a herpetology expert, and 36% of respondents reported public engagement  
266 was part of their job duties. Within the last 12 months, 67.5% of participants reported  
267 they had participated in at least 10 hours of public engagement activities, with 52.2%  
268 citing 10-49 hours and 10.2% reporting 55-99 hours of public engagement activities in  
269 the same period. Only 3.6% of respondents did not participate in any public  
270 engagement activities as a herpetology expert in the last 12 months. Half of the  
271 participants also had high levels of intention to participate in at least 10 hours of public  
272 engagement in the next 12 months with 47.8% expressing they were both highly likely  
273 to participate and also intended to participate at this level.

274 Respondents were more likely to develop their own engagement programs at  
275 least sometimes (85.2%) rather than participate in an already established program  
276 (62.5%). All but 6.5% of participants partnered in at least one stage of engagement, with  
277 37% partnering during activity development and 48% for implementation. Only 14% of

278 respondents never use live animals in their engagement activities, while 35.2% and  
279 18.2% use them sometimes and always, respectively. The number of public-oriented  
280 activity types that respondents were involved with over the past 12 months ranged from  
281 zero to fifteen with a mean of  $4.65 \pm 3.06$ . In-person lectures for the public, social  
282 media, and citizen science were the three most common public-oriented activities  
283 (Figure 2). Virtual lectures, blogs, science cafés, and teacher trainings were the least  
284 reported activities.

## 285 **Objective 2: Training and Knowledge**

286       Approximately two out of three participants (67.6%) stated they had never had  
287 any formal training in public engagement. Similarly, few respondents regularly used any  
288 resources to increase their knowledge about engagement, with 71.54% and 52.3%  
289 rarely or never reading peer-reviewed literature or using other resources to improve  
290 their public engagement strategies, respectively. Most participants reported that they  
291 adjust their message based on the audience they were engaging with, with 46% doing  
292 this all the time compared to only 4% never doing so. Three out of four respondents  
293 reported that they rarely or never evaluate their public engagement activities, and 54%  
294 have never thought about publishing about their public engagement activities. For those  
295 that do evaluate, evaluation was largely limited to less systematic methods like  
296 observing participants (43.3%), participant comments (46.1%), or counting the number  
297 of participants (34.8%). Respondents rarely evaluate programs with opinion surveys  
298 (16.9%), knowledge tests (7.9%), interviews (5.1%), social media metrics (11.8%),  
299 and/or external evaluators (8.4%). However, evaluation training was the most frequently  
300 selected option for what type of training herpetologists would be interested in (44.4%).  
301 How to have difficult conversations (38.8%) and how to develop programming (36.0%)

302 were the next two most popular training choices. About one in five (21.9%) of  
303 respondents were not interested in additional training.

### 304 **Objective 3: Barriers**

305 Participants cited limited time (74.3%) as the most common factor that at least  
306 sometimes prevented their participation in public engagement activities, followed by  
307 funds (46.9%). On a 7-point rising scale, 62.0%, 64.5%, and 62.5% of respondents  
308 reported that training, skills, and work very rarely or never prevented their participation  
309 respectively. Most participants used their own resources more often than work  
310 resources during their public engagement activities. When asked what would make  
311 them most likely to engage more often, grants or funds for public engagement were  
312 cited the most often (25.8%) followed by more engagement opportunities (23.0%) and  
313 dedicated work time (22.5%). Work-related recognition (9.6%), potential for publications  
314 (4.5%), and training (2.2%) were not commonly cited as factors that would make  
315 participants engage with the public more often.

### 316 **Objective 4: Impact of Conservation**

317 Respondents varied in how much they focus on conservation in their herpetology  
318 research, with 30.9% citing conservation as a focus all the time and 26.4% reporting  
319 they do conservation-related research less than half the time. Most respondents  
320 (69.1%) focus on herpetofauna conservation research at least half the time. Using a  
321 Kruskal-Wallis test, we found that individuals from these three levels of conservation  
322 research (low, medium, high) did not differ significantly in the hours of engagement in  
323 the past 12 months ( $\chi^2=4.92$ ,  $df=2$ ,  $p\text{-value}=0.086$ ). In contrast, intention to engage did  
324 differ significantly among the three conservation levels ( $\chi^2=7.38$ ,  $df=2$ ,  $p\text{-value}=0.025$ ,

325 Figure 3). In follow-up pair-wise comparisons using a Dunn's Test, we found a  
326 significant difference between the low and high conservation groups regarding intention  
327 to participate in at least 10 hours of public engagement in the next 12 months ( $Z=2.42$ ,  
328  $p$ -value= 0.049). Following Bonferroni correction, we did not find a significant difference  
329 between medium and high levels of conservation focus ( $Z= 2.0433$ ,  $p$ -value= 0.123). We  
330 found that sub-fields were not significant predictors of future intentions to engage at  
331 least 10 hours over the next 12 months, but conservation biology, taxonomy, behavior,  
332 and education were significant terms in the ordinal logistic regression predicting how  
333 many hours over the past 12 months respondents engaged with the public (Table 1;  
334 Table 2).

## 335 **Discussion**

336 Overall, we found that respondents were generally involved in public  
337 engagement activities, with less than 4% not participating in the past year. Similar  
338 patterns of general support and participation in public engagement activities have been  
339 noted in both general populations of scientists (Pew Research Center, 2015; Royal  
340 Society, 2006), as well as specific fields, such as particle physics (Rao, 2016); but not  
341 biology and physics professors at top research universities, where only 58% ( $n=150$ ) of  
342 respondents were involved in science outreach (Ecklund et al., 2012). The Pew  
343 Research Center report (2015) also noted a similar pattern of engagement levels to our  
344 study, with the most responding scientists fitting in the "occasional participation" level  
345 (49%) as compared to our 52.2% participating in 10-49 hours in the past 12 months.

346 We also found that herpetologists were participating in some specific activities  
347 with potential for two-way communication at similar rates to scientists in other studies.  
348 For example, our study found that respondents used social media (56% vs 47%) and

349 participated in policy making (20.7% vs 16%) at slightly higher rates than those in the  
350 AAAS study (Pew Research Center, 2015). Herpetologists in our study volunteered in  
351 schools (29.8%) more often than AAAS scientists (20%), but less often than biologists  
352 and physicists at top research universities (32%; Ecklund et al., 2012). Our respondents  
353 blogged less often than AAAS scientists (8.2% vs 24%). The small differences found  
354 between studies could be due to temporal changes such as an increase in general  
355 support for public engagement activities, federal funding for broader impacts, or a  
356 decrease in the popularity of written blogs since the 2015 AAAS study.

357         The connection between public engagement activities of scientists and public  
358 interest related to their field may help explain some of the patterns we found in this  
359 study, but additional factors related to wildlife outcomes may also encourage  
360 herpetologists to engage. Wildlife conservation is intimately tied to broader societal  
361 processes including socioeconomic factors, policy, and cultural norms; the field is  
362 directly tied to public interest. Therefore, we expected herpetologists who participated in  
363 conservation research to have higher levels of intention to participate in engagement  
364 activities. As we hypothesized, engagement intentions differed significantly in  
365 responding herpetologists based on their level of conservation focus in their own  
366 research. In addition, reporting conservation biology as one of their sub-fields was a  
367 significant predictor of how many hours herpetologists had engaged in public  
368 engagement in the last 12 months. While public interest is one possible explanation for  
369 the greater intentions seen among more conservation-oriented herpetologists, public  
370 opinions of reptile and amphibian conservation may also play a role. During qualitative  
371 interviews, we found that herpetologists' interest in conserving herpetofauna is often

372 tied to societal beliefs and the public's negative attitudes toward and persecution of  
373 herpetofauna (Hecht, 2021). Thus at least for conservation-oriented herpetologists,  
374 scientific engagement activities appear to be driven in part by herpetofauna welfare  
375 rather than public interest. Thus, the influence of public interest on scientists'  
376 engagement levels may expand beyond how much scientists feel the public is  
377 interested in their field to include how much the public impacts or is integrated with a  
378 scientist's field of study.

379 Another finding of this study is that factors measuring the conservation focus of  
380 respondents' research were not consistent in their predictive powers when comparing  
381 herpetologists' future engagement intention to participation in the past 12 months. For  
382 example, a high level of conservation focus in research was associated with a higher  
383 intention to participate in engagement within the next 12 months, but did not result in  
384 higher levels of engagement within the past 12 months. In contrast, selection of  
385 conservation biology as a relevant sub-field of their research was a significant predictor  
386 of herpetologists' engagement activity over the past 12 months, but not of their future  
387 intention to engage. In addition, taxonomy, behavior, and education were also  
388 significant predictors of future intention. While this could suggest that barriers are  
389 preventing some individuals from participating at levels they would like to, alternative  
390 explanations are also likely. These sub-field findings may be due to survey design  
391 considerations for example, as respondents were able to report all sub-fields that they  
392 participate in, rather than only their main sub-field. Impacts of job sector may also be at  
393 play, as taxonomy is a common field of study associated with museums which often  
394 have a public mission focus.



395           While our survey respondents represented the overall demographics of  
396 herpetologists, ecology and conservation sub-fields may have been over-represented in  
397 our survey response. Since there are no data available about representation of sub-  
398 fields in herpetology, the implications of this to the results of our study are unclear. As  
399 those with a focus in conservation may be more likely to intend to participate or  
400 ultimately participate in public engagement based on the results of our study, one  
401 concern is that this finding suggests self-selection bias in our respondents toward those  
402 with increased interests in public engagement. Self-selection bias describes a sampling  
403 error where a certain sub-group of your population of interest, in this case those who  
404 may have different values or beliefs about public engagement, respond more often than  
405 those in other sub-groups, affecting survey results (Heckman, 1990; Whitehead, 1991).  
406 Despite these concerns, however, our respondents represented a normal distribution of  
407 actual participation in public engagement activities over the past 12 months. While this  
408 finding does not erase the possibility of self-selection bias based on interest, it does  
409 suggest that our results remain valid and still represent the spectrum our target  
410 population regarding their experiences with public engagement.

#### 411 **Recommendations:**

412           We found that most respondents were already regularly engaging with the public  
413 with over 2/3 of respondents regularly engaging at least 10 hours of engagement  
414 activities over the last 12 months. Respondents also reported high levels of intention to  
415 participate in public engagement over the next 12 months, despite noted barriers. Public  
416 engagement seems to be generally accepted and valued by our respondents. However,  
417 the discrepancies noted between intention to engage and actual past activity as well as  
418 reports from participants that barriers prevented participation suggest that at least some

419 herpetologists are interested in participating in public engagement activities more often  
420 than they are able. Therefore, we recommend that individuals and organizations with an  
421 interest in supporting public engagement activities focus on reducing the following key  
422 barriers and increasing awareness of engagement best practices to interested  
423 individuals.

424         Most of these respondents have not received training in public engagement skills  
425 or strategies, and many are interested in increasing their knowledge of best practices.  
426 Increasing herpetologists' use of public engagement best practices may hold unique  
427 challenges since herpetologists may largely be unaware of the existence or importance  
428 of engagement best practices. Only a third of respondents received any type of training  
429 for conducting public engagement and most rarely or never consulted peer-reviewed  
430 literature or other resources to improve their engagement knowledge or skills. While  
431 these findings suggest that herpetologists may not be fluent in the language of public  
432 engagement, most respondents are doing something, suggesting that these  
433 respondents are not being prevented from engaging due to their lack of training or  
434 knowledge. However, the low use of some best practices, especially evaluation, shows  
435 that there is room for improvement in engagement practices, and it is unclear how  
436 effective their engagement practices may be. Therefore, one of the first challenges is to  
437 promote public engagement as a skill or sub-field much like other emerging  
438 conservation tools in herpetology such as structured decision making (Gregory et al.,  
439 2012).

440         Tempering these potential challenges in understanding and improving  
441 engagement best practices in herpetology, our respondents reported openness to

442 learning more despite feeling it was unnecessary for their participation. Four out of five  
443 of herpetologist surveyed expressed interest in receiving some type of engagement  
444 training. Even more promising is that those responding expressed the most interest in  
445 receiving engagement training which also represented was one of the identified problem  
446 areas we found in our survey. Therefore, providing training opportunities in evaluation,  
447 developing engagement programs, and holding difficult conversations will likely receive  
448 interest, provided participants experience minimal time and money barriers to access  
449 these professional development opportunities. Providing these professional  
450 development opportunities at herpetology conferences or virtually may be one  
451 opportunity. Another option, due to the already strong culture of partnering for  
452 engagement opportunities, is to instead focus on connecting herpetologists to partners  
453 with expertise in these areas of interest to provide support.

454 Our last recommendations focus on reducing the barriers of time and money to  
455 allow herpetologists who wish to engage the opportunity to do so at their desired level.  
456 Herpetology and conservation organizations should consider developing funding  
457 opportunities designed to directly fund related engagement. Respondents were also  
458 interested in more engagement opportunities (23.0%), suggesting they may not be  
459 aware of already existing possibilities to participate. Conservation and herpetological  
460 organizations could focus on providing resources to connect herpetologists to public  
461 engagement opportunities and partnerships to increase the frequency and quality of  
462 engagement activities. Lastly, since most respondents were using their own resources  
463 to conduct engagement, employers interested in supporting their employee's public

464 engagement activities could allow some fraction of work time to be used for  
465 engagement activities or provide other resources.

466         Future research should further examine how much herpetologists are already  
467 utilizing best practices, especially for their desired goals. While our results show a few  
468 glaring issues with engagement best practices in herpetology, especially regarding  
469 evaluation, other best practices such as using live animals or adjusting messages to an  
470 audience were reported as being regularly utilized. However, since these questions  
471 were asked generally, and herpetologists may not share the same understanding of  
472 how to put these suggestions into practice, a more thorough investigation is necessary  
473 to know how to improve usage. For example, other studies have found that scientists  
474 frequently use a knowledge deficit model when communicating with the public (Davies,  
475 2008), despite studies that suggest this model generally does not lead to positive  
476 outcomes in science communication or public engagement goals. If herpetologists are  
477 indeed adjusting their message based on their audience but only doing so in certain  
478 ways, like avoiding jargon, their approaches still largely focus only on transferring  
479 scientific knowledge to their audience, which may not necessarily lead to the positive  
480 outcomes best practices strive for.

481         While we recognize our results focus on herpetologists as a case study, we  
482 anticipate that these findings and recommendations may be more universally applicable  
483 in the conservation field, especially for individuals studying organisms or ecosystems  
484 that receive less conservation attention than charismatic animals, which generally  
485 receive more support for conservation both from the public and from within the  
486 conservation field itself (Clucas et al., 2008; de Pinho et al., 2014). Future research

487 should investigate engagement in related sub-fields that have a natural resource and/or  
488 conservation focus to determine if our findings are unique to herpetology or are similar  
489 across related sub-fields. Specifically, these studies should compare sub-fields with  
490 more charismatic animals, like ornithology and mammalogy, with those sharing typically  
491 uncharismatic animals like entomology and shark biology. Comparisons of scientists  
492 working in basic ichthyology with those working in fisheries science, a sub-field with a  
493 long history of public involvement due to the recreational, economic, and subsistence  
494 nature of the field, could also provide additional insight on how public views of the study  
495 animal and the importance of the public in the field may influence scientists'  
496 participation in public engagement.

#### 497 **CRedit author statement**

498 **K. Hecht:** Conceptualization, Methodology, Software, Formal Analysis, Investigation,  
499 Data Curation, Writing -Original Draft Preparation, Funding Acquisition ; **K. Stofer:**  
500 Conceptualization, Methodology, Writing-Review & Editing, Supervision, Project  
501 Administration; **M. Monroe:** Conceptualization, Methodology, Writing-Review & Editing,  
502 Supervision; **G. Klarenberg:** Software, Formal Analysis, Writing-Review & Editing; **M.**  
503 **Nickerson:** Conceptualization, Writing-Review, Supervision.

504

505

#### **References**

506 2019 Diversity Survey Report, 2020. ASIH Diversity and Inclusion Committee.  
507 AAAS, 2021. Why Public Engagement Matters [WWW Document]. American Association for  
508 the Advancement of Science. URL [https://www.aaas.org/resources/communication-](https://www.aaas.org/resources/communication-toolkit/what-public-engagement)  
509 [toolkit/what-public-engagement](https://www.aaas.org/resources/communication-toolkit/what-public-engagement) (accessed 1.4.21).  
510 Adams, M.J., Miller, D.A.W., Muths, E., Corn, P.S., Grant, E.H.C., Bailey, L.L., Fellers, G.M.,  
511 Fisher, R.N., Sadinski, W.J., Waddle, H., Walls, S.C., 2013. Trends in amphibian  
512 occupancy in the United States. PLoS ONE 8, e64347.  
513 <https://doi.org/10.1371/journal.pone.0064347>

- 514 Agrawal, A., Gibson, C.C., 1999. Enchantment and disenchantment: The role of community in  
515 natural resource conservation. *World Development* 27, 629–649.  
516 [https://doi.org/10.1016/S0305-750X\(98\)00161-2](https://doi.org/10.1016/S0305-750X(98)00161-2)
- 517 Ajzen, I., 2006. Constructing a theory of planned behavior questionnaire. Amherst, MA.
- 518 Akaike, H., 1998. Information theory and an extension of the maximum likelihood principle.  
519 *Selected Papers of Hirotugu Akaike*, Springer Series in Statistics 199–213.
- 520 Alves, R.R.N., Vieira, K.S., Santana, G.G., Vieira, W.L.S., Almeida, W.O., Souto, W.M.S.,  
521 Montenegro, P.F.G.P., Pezzuti, J.C.B., 2012. A review on human attitudes towards  
522 reptiles in Brazil. *Environmental Monitoring and Assessment* 184, 6877–6901.  
523 <https://doi.org/10.1007/s10661-011-2465-0>
- 524 Balakrishnan, P., 2010. An education programme and establishment of a citizen scientist network  
525 to reduce killing of non-venomous snakes in Malappuram district, Kerala, India.  
526 *Conservation Evidence* 7, 9–15.
- 527 Ballouard, J.-M., Provost, G., Barré, D., Bonnet, X., 2012. Influence of a Field Trip on the  
528 Attitude of Schoolchildren toward Unpopular Organisms: An Experience with Snakes.  
529 *hpet* 46, 423–428. <https://doi.org/10.1670/11-118>
- 530 Ban, N.C., Mills, M., Tam, J., Hicks, C.C., Klain, S., Stoeckl, N., Bottrill, M.C., Levine, J.,  
531 Pressey, R.L., Satterfield, T., Chan, K.M., 2013. A social–ecological approach to  
532 conservation planning: embedding social considerations. *Frontiers in Ecology and the*  
533 *Environment* 11, 194–202. <https://doi.org/10.1890/110205>
- 534 Bennett, N.J., Roth, R., Klain, S.C., Chan, K.M.A., Clark, D.A., Cullman, G., Epstein, G.,  
535 Nelson, M.P., Stedman, R., Teel, T.L., Thomas, R.E.W., Wyborn, C., Curran, D.,  
536 Greenberg, A., Sandlos, J., Veríssimo, D., 2017. Mainstreaming the social sciences in  
537 conservation. *Conservation Biology* 31, 56–66. <https://doi.org/10.1111/cobi.12788>
- 538 Böhm, M., Collen, B., Baillie, J.E.M., Bowles, P., Chanson, J., Cox, N., Hammerson, G.,  
539 Hoffmann, M., Livingstone, S.R., Ram, M., Afuang, L.E., Aghasyan, A., García, A.,  
540 Aguilar, C., Ajtic, R., Akarsu, F., Alencar, L.R.V., Allison, A., Ananjeva, N., Anderson,  
541 S., André, C., Ariano-Sánchez, D., Arredondo, J.C., Auliya, M., Austin, C.C., Avci, A.,  
542 Baker, P.J., Barreto-Lima, A.F., Barrio-Amorós, C.L., Basu, D., Bates, M.F., Batistella,  
543 A., Bauer, A., Bennett, D., Böhme, W., Broadley, D., Brown, R., Burgess, J., Captain, A.,  
544 Carreira, S., Castañeda, M. del R., Castro, F., Catenazzi, A., Cedeño-Vázquez, J.R.,  
545 Chapple, D.G., Cheylan, M., Cisneros-Heredia, D.F., Cogalniceanu, D., Cogger, H.,  
546 Corti, C., Costa, G.C., Couper, P.J., Courtney, T., Crnobrnja-Isailovic, J., Crochet, P.-A.,  
547 Crother, B., Cruz, F., Daltry, J.C., Daniels, R.J.R., Das, I., de Silva, A., Diesmos, A.C.,  
548 Dirksen, L., Doan, T.M., Dodd, C.K., Doody, J.S., Dorcas, M.E., Duarte de Barros Filho,  
549 J., Egan, V.T., El Mouden, E.H., Embert, D., Espinoza, R.E., Fallabrino, A., Feng, X.,  
550 Feng, Z.-J., Fitzgerald, L., Flores-Villela, O., França, F.G.R., Frost, D., Gadsden, H.,  
551 Gamble, T., Ganesh, S.R., Garcia, M.A., García-Pérez, J.E., Gatus, J., Gaulke, M.,  
552 Geniez, P., Georges, A., Gerlach, J., Goldberg, S., Gonzalez, J.-C.T., Gower, D.J., Grant,  
553 T., Greenbaum, E., Grieco, C., Guo, P., Hamilton, A.M., Hare, K., Hedges, S.B.,  
554 Heideman, N., Hilton-Taylor, C., Hitchmough, R., Hollingsworth, B., Hutchinson, M.,  
555 Ineich, I., Iverson, J., Jaksic, F.M., Jenkins, R., Joger, U., Jose, R., Kaska, Y., Kaya, U.,  
556 Keogh, J.S., Köhler, G., Kuchling, G., Kumlutaş, Y., Kwet, A., La Marca, E., Lamar, W.,  
557 Lane, A., Lardner, B., Latta, C., Latta, G., Lau, M., Lavin, P., Lawson, D., LeBreton, M.,  
558 Lehr, E., Limpus, D., Lipczynski, N., Lobo, A.S., López-Luna, M.A., Luiselli, L.,  
559 Lukoschek, V., Lundberg, M., Lymberakis, P., Macey, R., Magnusson, W.E., Mahler,

- 560 D.L., Malhotra, A., Mariaux, J., Marques, O.A.V., Márquez, R., Martins, M., Masterson,  
561 G., Mateo, J.A., Mathew, R., Mathews, N., Mayer, G., McCranie, J.R., Measey, G.J.,  
562 Mendoza-Quijano, F., Menegon, M., Métraiier, S., Milton, D.A., Montgomery, C.,  
563 Morato, S.A.A., Mott, T., Muñoz-Alonso, A., Murphy, J., Nguyen, T.Q., Nilson, G.,  
564 Nogueira, C., Núñez, H., Orlov, N., Ota, H., Ottenwalder, J., Papenfuss, T., Pasachnik,  
565 S., Passos, P., Pauwels, O.S.G., Pérez-Buitrago, N., Pérez-Mellado, V., Pianka, E.R.,  
566 Pleguezuelos, J., Pollock, C., Ponce-Campos, P., Powell, R., Pupin, F., Quintero Díaz,  
567 G.E., Radder, R., Ramer, J., Rasmussen, A.R., Raxworthy, C., Reynolds, R., Richman,  
568 N., Rico, E.L., Riservato, E., Rivas, G., da Rocha, P.L.B., Rödel, M.-O., Rodríguez  
569 Schettino, L., Roosenburg, W.M., Ross, J.P., Sadek, R., Sanders, K., Santos-Barrera, G.,  
570 Schleich, H.H., Schmidt, B.R., Schmitz, A., Sharifi, M., Shea, G., Shi, H.-T., Shine, R.,  
571 Sindaco, R., Slimani, T., Somaweera, R., Spawls, S., Stafford, P., Stuebing, R., Sweet, S.,  
572 Sy, E., Temple, H.J., Tognelli, M.F., Tolley, K., Tolson, P.J., Tuniyev, B., Tuniyev, S.,  
573 Üzüüm, N., van Buurt, G., Van Sluys, M., Velasco, A., Vences, M., Veselý, M., Vinke, S.,  
574 Vinke, T., Vogel, G., Vogrin, M., Vogt, R.C., Wearn, O.R., Werner, Y.L., Whiting, M.J.,  
575 Wiewandt, T., Wilkinson, J., Wilson, B., Wren, S., Zamin, T., Zhou, K., Zug, G., 2013.  
576 The conservation status of the world's reptiles. *Biological Conservation* 157, 372–385.  
577 <https://doi.org/10.1016/j.biocon.2012.07.015>
- 578 Bonnet, X., Shine, R., Lourdaïs, O., 2002. Taxonomic chauvinism. *Trends in Ecology &*  
579 *Evolution* 17, 1–3. [https://doi.org/10.1016/S0169-5347\(01\)02381-3](https://doi.org/10.1016/S0169-5347(01)02381-3)
- 580 Ceriaco, L.M., 2012. Human attitudes towards herpetofauna: The influence of folklore and  
581 negative values on the conservation of amphibians and reptiles in Portugal. *Journal of*  
582 *Ethnobiology and Ethnomedicine* 8, 8. <https://doi.org/10.1186/1746-4269-8-8>
- 583 Ceriaco, L.M.P., Marques, M.P., Madeira, N.C., Vila-Vicosa, C.M., Mendes, P., 2011. Folklore  
584 and traditional ecological knowledge of geckos in Southern Portugal: Implications for  
585 conservation and science. *Journal of Ethnobiology and Ethnomedicine* 7, 26.  
586 <https://doi.org/10.1186/1746-4269-7-26>
- 587 Chiszar, D., 1998. Herpetology, Critical Thinking, Curriculum Committees, and Disciplinary  
588 Fundamentalism. *Herpetologica* 54, S6–S11.
- 589 Clancy, K., Everett, K., Bacha, K., Hecht, K., Stofer, K.A., 2021. Lack of education and outreach  
590 publications in herpetology journals points to disconnect with human dimensions best  
591 practices. Manuscript in preparation.
- 592 Clucas, B., McHugh, K., Caro, T., 2008. Flagship species on covers of US conservation and  
593 nature magazines. *Biodivers Conserv* 17, 1517–1528. [https://doi.org/10.1007/s10531-](https://doi.org/10.1007/s10531-008-9361-0)  
594 [008-9361-0](https://doi.org/10.1007/s10531-008-9361-0)
- 595 Davies, S.R., 2008. Constructing communication: talking to scientists about talking to the public.  
596 *Science Communication* 29, 413–434. <https://doi.org/10.1177/1075547008316222>
- 597 de Pinho, J.R., Grilo, C., Boone, R.B., Galvin, K.A., Snodgrass, J.G., 2014. Influence of  
598 aesthetic appreciation of wildlife species on attitudes towards their conservation in  
599 Kenyan agropastoralist communities. *PLoS ONE* 9, e88842.  
600 <https://doi.org/10.1371/journal.pone.0088842>
- 601 Demographic and Atmospheric Survey, 2020. . PARC Diversity, Equity, and Inclusion Task  
602 Team.
- 603 Dormann, C.F., Elith, J., Bacher, S., Buchmann, C., Carl, G., Carré, G., Marquéz, J.R.G.,  
604 Gruber, B., Lafourcade, B., Leitão, P.J., Münkemüller, T., McClean, C., Osborne, P.E.,  
605 Reineking, B., Schröder, B., Skidmore, A.K., Zurell, D., Lautenbach, S., 2013.

- 606 Collinearity: a review of methods to deal with it and a simulation study evaluating their  
607 performance. *Ecography* 36, 27–46. <https://doi.org/10.1111/j.1600-0587.2012.07348.x>
- 608 Ecklund, E.H., James, S.A., Lincoln, A.E., 2012. How academic biologists and physicists view  
609 science outreach. *PLOS ONE* 7, e36240. <https://doi.org/10.1371/journal.pone.0036240>
- 610 Frost, D., 1998. Graduate education and natural history museums. *Herpetologica* 54, S17–S21.
- 611 Gangloff, E., 2011. Urban students and urban serpents: The effects of hands-on learning in  
612 student perception of snakes. *Herpetological Review* 42, 349–351.
- 613 Grant, E.H.C., Miller, D.A.W., Schmidt, B.R., Adams, M.J., Amburgey, S.M., Chambert, T.,  
614 Cruickshank, S.S., Fisher, R.N., Green, D.M., Hossack, B.R., Johnson, P.T.J., Joseph,  
615 M.B., Rittenhouse, T.A.G., Ryan, M.E., Waddle, J.H., Walls, S.C., Bailey, L.L., Fellers,  
616 G.M., Gorman, T.A., Ray, A.M., Pilliod, D.S., Price, S.J., Saenz, D., Sadinski, W.,  
617 Muths, E., 2016. Quantitative evidence for the effects of multiple drivers on continental-  
618 scale amphibian declines. *Scientific Reports* 6. <https://doi.org/10.1038/srep25625>
- 619 Gratwicke, B., Lovejoy, T.E., Wildt, D.E., 2012. Will Amphibians Croak under the Endangered  
620 Species Act? *BioScience* 62, 197–202. <https://doi.org/10.1525/bio.2012.62.2.13>
- 621 Gregory, R., Failing, L., Harstone, M., Long, G., McDaniels, T., Ohlson, D., 2012. Structured  
622 Decision Making: A Practical Guide to Environmental Management Choices. John Wiley  
623 & Sons.
- 624 Gunnthorsdottir, A., 2001. Physical attractiveness of an animal species as a decision factor for its  
625 preservation. *Anthrozoös* 14, 204–215. <https://doi.org/10.2752/089279301786999355>
- 626 Hecht, K., 2021. A mixed-methods investigation of herpetologists' public engagement  
627 (Dissertation). University of Florida, Gainesville, FL.
- 628 Heckman, J.J., 1990. Selection Bias and Self-selection, in: Eatwell, J., Milgate, M., Newman, P.  
629 (Eds.), *Econometrics*, The New Palgrave. Palgrave Macmillan UK, London, pp. 201–224.  
630 [https://doi.org/10.1007/978-1-349-20570-7\\_29](https://doi.org/10.1007/978-1-349-20570-7_29)
- 631 Hoehl, S., Hellmer, K., Johansson, M., Gredebäck, G., 2017. Itsy bitsy spider...: Infants react  
632 with increased arousal to spiders and snakes. *Front. Psychol.* 8.  
633 <https://doi.org/10.3389/fpsyg.2017.01710>
- 634 IUCN, 2018. The IUCN Red List of Threatened Species Summary Statistics. Version 2018-1.
- 635 Jimenez, J.N., Lindemann-Matthies, P., 2015. Public Knowledge and Perception of Toads and  
636 Frogs in Three Areas of Subtropical Southeast China. *Society & Animals* 23, 166–  
637 192. <https://doi.org/10.1163/15685306-12341368>
- 638 Knight, A.J., 2008. “Bats, snakes and spiders, Oh my!” How aesthetic and negativistic attitudes,  
639 and other concepts predict support for species protection. *Journal of Environmental*  
640 *Psychology* 28, 94–103. <https://doi.org/10.1016/j.jenvp.2007.10.001>
- 641 Knight, A.T., Cowling, R.M., Campbell, B.M., 2006. An operational model for implementing  
642 conservation action. *Conservation Biology* 20, 408–419. <https://doi.org/10.1111/j.1523-1739.2006.00305.x>
- 643
- 644 LoBue, V., DeLoache, J.S., 2008. The snake in the grass: attention to fear-relevant stimuli by  
645 adults and young children. *Psychological Science* 19, 284–289.  
646 <https://doi.org/10.1111/j.1467-9280.2008.02081.x>
- 647 Mascia, M.B., Brosius, J.P., Dobson, T.A., Forbes, B.C., Horowitz, L., McKean, M.A., Turner,  
648 N.J., 2003. Conservation and the social sciences. *Conservation Biology* 17, 649–650.  
649 <https://doi.org/10.1046/j.1523-1739.2003.01738.x>
- 650 Meffe, G.K. (Ed.), 2002. *Ecosystem Management: Adaptive, Community-Based Conservation*.  
651 Island Press, Washington, D.C.



- 652 Morgan, J.M., Gramann, J., 1989. Predicting effectiveness of wildlife education programs: A  
653 study of students' attitudes and knowledge toward snakes. *Wildlife Society Bulletin* 17,  
654 501–509.
- 655 O'Donnell, R.P., Durso, A.M., 2014. Harnessing the power of a global network of citizen  
656 herpetologists by improving citizen science databases. *Herpetological Review* 45, 151–  
657 157.
- 658 Perry-Hill, R., Smith, J.W., Reimer, A., Mase, A.S., Mullendore, N., Mulvaney, K.K., Prokopy,  
659 L.S., 2014. The influence of basic beliefs and object-specific attitudes on behavioural  
660 intentions towards a rare and little-known amphibian. *Wildlife Research* 41, 287.  
661 <https://doi.org/10.1071/WR13218>
- 662 Pew Research Center, 2015. How Scientists Engage the Public.
- 663 Prokop, P., Tunnicliffe, S.D., 2010. Effects of having pets at home on children's attitudes toward  
664 popular and unpopular animals. *Anthrozoös* 23, 21–35.  
665 <https://doi.org/10.2752/175303710X12627079939107>
- 666 Rao, A., 2016. Attitudes towards outreach within the particle-physics research community.  
667 Proceedings for the 2016 Public Communication of Science and Technology Conference.  
668 <https://doi.org/10.5281/zenodo.60214>
- 669 Reimer, A., Mase, A., Mulvaney, K., Mullendore, N., Perry-Hill, R., Prokopy, L., 2014. The  
670 impact of information and familiarity on public attitudes toward the eastern hellbender:  
671 Attitudes toward a rare salamander. *Animal Conservation* 17, 235–243.  
672 <https://doi.org/10.1111/acv.12085>
- 673 Reynolds, B.R., Salamander, T., Wilson, T.P., 2018. A walk in the woods: changing student  
674 attitudes toward amphibians and reptiles. *Creative Education* 09, 182–191.  
675 <https://doi.org/10.4236/ce.2018.92014>
- 676 Rommel-Crump, R., Crump, P., Packard, J., 2016. Leaping from awareness to action: impacts of  
677 an amphibian educator workshop. *Journal of Herpetology* 50, 12–16.  
678 <https://doi.org/10.1670/14-025>
- 679 Royal Society, 2006. Survey of factors affecting science communication by scientists and  
680 engineers. (Final Report). Royal Society, London, England.
- 681 Saunders, C.D., Brook, A.T., Myers, O.E., 2006. Using psychology to save biodiversity and  
682 human well-being. *Conservation Biology* 20, 702–705. [https://doi.org/10.1111/j.1523-  
683 1739.2006.00435.x](https://doi.org/10.1111/j.1523-1739.2006.00435.x)
- 684 Southwestern Center for Herpetological Research, 2017. Special Publication No. 2: 2015  
685 Reptile and Amphibian Public Opinion Survey. (No. Final Report).
- 686 Tarrant, J., Kruger, D., du Preez, L.H., 2016. Do public attitudes affect conservation effort?  
687 Using a questionnaire-based survey to assess perceptions, beliefs and superstitions  
688 associated with frogs in South Africa. *African Zoology* 51, 13–20.  
689 <https://doi.org/10.1080/15627020.2015.1122554>
- 690 Tomažic, I., 2011. Pre-Service Biology Teachers' and Primary School Students' Attitudes  
691 Toward and Knowledge about Snakes. *EURASIA Journal of Mathematics, Science &  
692 Technology Education*, 7, 161–171.
- 693 Wake, M.H., 2008. “eye of newt and toe of frog”: herpetology in 21st century science.  
694 *Herpetologica* 64, 1–11. <https://doi.org/10.1655/07-055.1>
- 695 Weber, D., Schuett, G., Tluczek, M., 2016. A citizen science survey of the herpetofauna of  
696 Scottsdale's McDowell Sonoran Preserve, Arizona, USA. *Herpetological Review* 47, 5–  
697 10.

- 698 Whitehead, J.C., 1991. Environmental interest group behavior and self-selection bias in  
 699 contingent valuation mail surveys. *Growth and Change* 22, 10–20.  
 700 <https://doi.org/10.1111/j.1468-2257.1991.tb00538.x>  
 701 Wilson, K.A., Underwood, E.C., Morrison, S.A., Klausmeyer, K.R., Murdoch, W.W., Reyers,  
 702 B., Wardell-Johnson, G., Marquet, P.A., Rundel, P.W., McBride, M.F., Pressey, R.L.,  
 703 Bode, M., Hoekstra, J.M., Andelman, S., Looker, M., Rondinini, C., Kareiva, P., Shaw,  
 704 M.R., Possingham, H.P., 2007. Conserving biodiversity efficiently: what to do, where,  
 705 and when. *PLoS Biology* 5, e223. <https://doi.org/10.1371/journal.pbio.0050223>  
 706 Wojnowski, D., 2008. Traditional and scientific conceptions of snakes in Kenya: Alternative  
 707 perspectives for teaching (Dissertation). Kent State University.  
 708  
 709

710 Table 1. Stepwise model selection for

| Model                      | Parameters | AIC    |
|----------------------------|------------|--------|
| All subfields              | 9          | 425.58 |
| Removed ecology            | 8          | 423.60 |
| Removed physiology         | 7          | 422.12 |
| Removed evolution          | 6          | 420.50 |
| Removed human dimension    | 5          | 419.51 |
| Removed morphology/anatomy | 4          | 419.20 |

711  
 712 Table 2. Final results for model parameters of ordinal logistic regression measuring  
 713 hours of engagement of respondent herpetologists by subfield

|                      | Value | Std. Error | t value | p value | Odds ratio | 95% CI        |
|----------------------|-------|------------|---------|---------|------------|---------------|
| Conservation Biology | 0.752 | 0.342      | 2.199   | 0.03    | 2.118      | 1.088 – 4.170 |
| Taxonomy             | 0.833 | 0.359      | 2.319   | 0.02    | 0.939      | 1.430 – 4.687 |
| Behavior             | 0.682 | 0.297      | 2.299   | 0.02    | 0.765      | 1.111 – 3.561 |
| Education            | 1.114 | 0.569      | 1.958   | 0.05    | 1.309      | 0.988 – 9.348 |

714

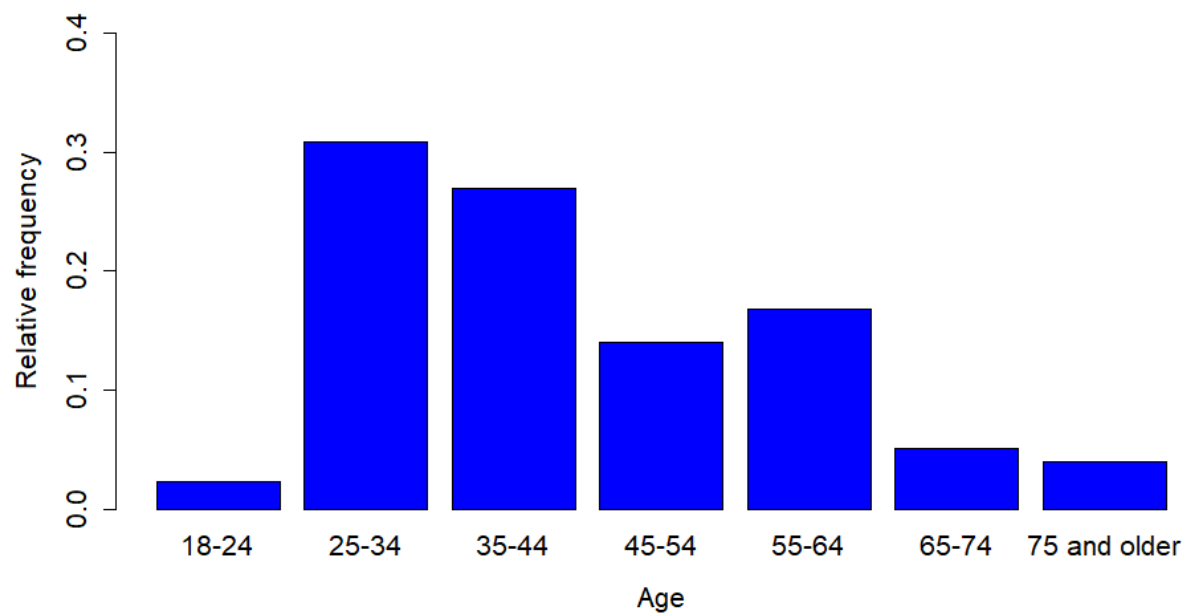

715 Figure 1. Age distribution of respondent herpetologists.

716

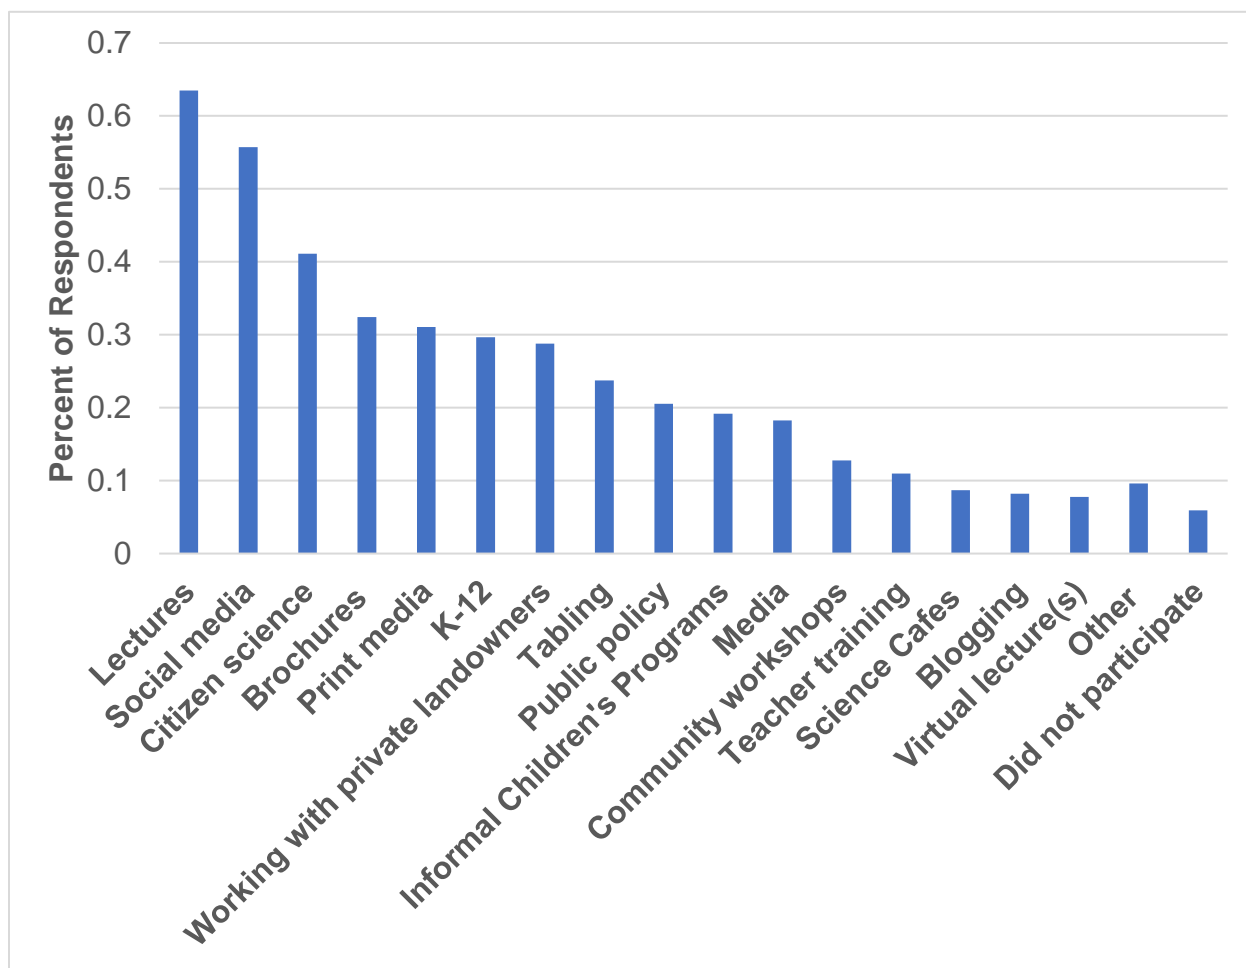

717

718 Figure 2. Types of public activities undertaken by respondent herpetologists within the  
719 past 12 months.

720

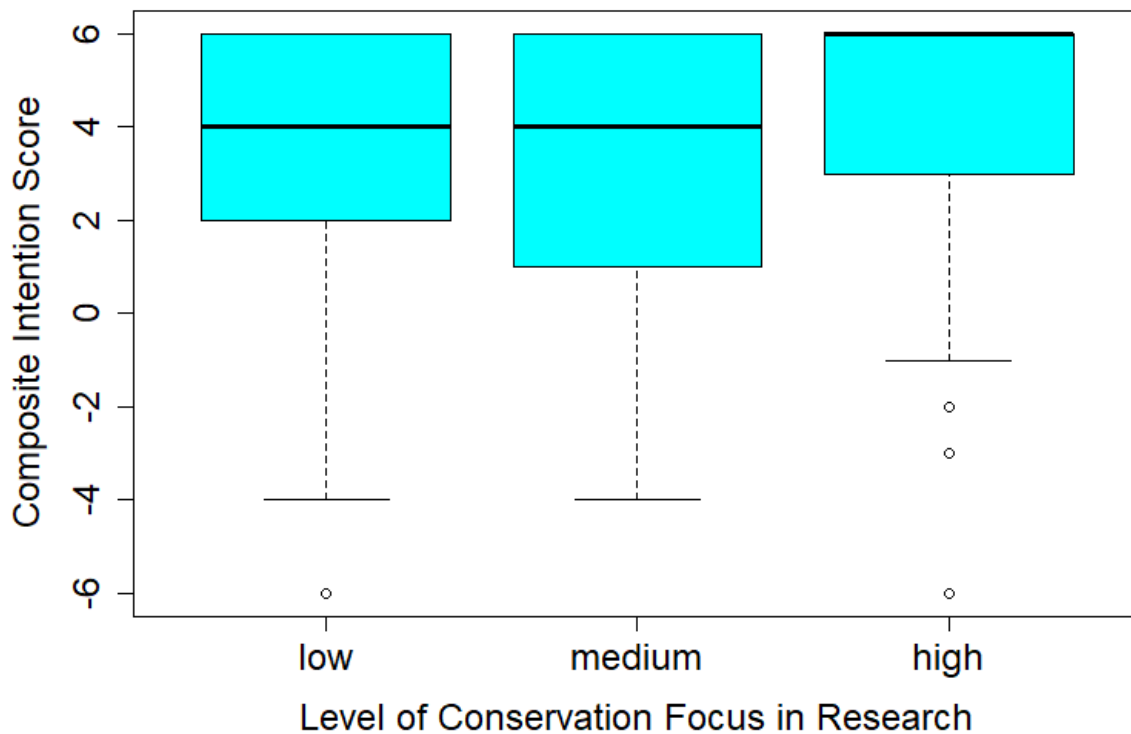

721  
722

723 Figure 3. Boxplot of low (n=55), medium (n=23), and high (n=100) levels of  
724 conservation focus in sampled herpetologists' research vs their intention to  
725 participate in public engagement for at least 10 hours over the next 12  
726 months.
